# Supplementary material for: Interaction effects of different chemical fractions of lanthanum, cerium, and fluorine on the taxonomic composition of soil microbial community
Source: PubMed Central journal article supplement — BMC Microbiol. 2024 Dec 27;24:539. doi: 10.1186/s12866-024-03708-4 (PMC11674582; doi:10.1186/s12866-024-03708-4), 2024-12-27
Supplement: 12866_2024_3708_MOESM1_ESM.pdf [file 12866_2024_3708_MOESM1_ESM.pdf]

**Table S1** Relative abundance of sensitive and tolerant microbes at genus level in soils contaminated by various combinations of lanthanum (La), cerium (Ce), and fluorine (F)

| Relative abundance of microbes (%) |                            | CK     | LC1    | LC2    | LC3    | LC4    | LC5    | CF1    | CF2    | CF3    | CF4    | CF5    | LF1    | LF2    | LF3    | LF4    | LF5     | LCF1    | LCF2   | LCF3    | LCF4   | LCF5   |
|------------------------------------|----------------------------|--------|--------|--------|--------|--------|--------|--------|--------|--------|--------|--------|--------|--------|--------|--------|---------|---------|--------|---------|--------|--------|
| phylum                             | genus                      |        |        |        |        |        |        |        |        |        |        |        |        |        |        |        |         |         |        |         |        |        |
| <b>Abditibacteriota</b>            | <b>Abditibacterium</b>     | 0.003  | 0.00   | 0.00   | 0.00   | 0.00   | 0.00   | 0.00   | 0.01   | 0.05   | 0.07   | 0.09   | 0.00   | 0.00   | 0.03   | 0.10   | 0.15    | 0.00    | 0.00   | 0.04    | 0.05   | 0.21   |
| <b>Nitrospirota</b>                | <b>Nitrospira</b>          | 0.0004 | 0.001  | 0.001  | 0.001  | 0.0001 | 0.00   | 0.001  | 0.001  | 0.001  | 0.0001 | 0.00   | 0.001  | 0.001  | 0.0002 | 0.00   | 0.0002  | 0.0012  | 0.0005 | 0.0002  | 0.00   | 0.00   |
|                                    | <b>c_4-29-1</b>            | 0.0001 | 0.00   | 0.00   | 0.00   | 0.00   | 0.00   | 0.00   | 0.00   | 0.00   | 0.00   | 0.00   | 0.00   | 0.00   | 0.00   | 0.00   | 0.00    | 0.00    | 0.00   | 0.00    | 0.00   | 0.00   |
|                                    | <b>Gemmatomacidae</b>      | 0.010  | 0.006  | 0.007  | 0.005  | 0.002  | 0.002  | 0.010  | 0.017  | 0.012  | 0.006  | 0.003  | 0.011  | 0.010  | 0.011  | 0.016  | 0.007   | 0.007   | 0.010  | 0.007   | 0.002  | 0.003  |
|                                    | <b>Isoosphaeraceae</b>     | 0.005  | 0.004  | 0.011  | 0.011  | 0.001  | 0.002  | 0.004  | 0.009  | 0.009  | 0.004  | 0.002  | 0.004  | 0.004  | 0.005  | 0.008  | 0.005   | 0.003   | 0.004  | 0.004   | 0.002  | 0.003  |
|                                    | <b>WD2101</b>              | 0.00   | 0.00   | 0.00   | 0.00   | 0.00   | 0.00   | 0.00   | 0.00   | 0.0002 | 0.00   | 0.00   | 0.00   | 0.00   | 0.001  | 0.00   | 0.00    | 0.00    | 0.00   | 0.00    | 0.00   | 0.00   |
| <b>Planctomycetota</b>             | <b>SM1A02</b>              | 0.00   | 0.00   | 0.00   | 0.00   | 0.00   | 0.00   | 0.00   | 0.00   | 0.0001 | 0.0002 | 0.0001 | 0.0001 | 0.00   | 0.0001 | 0.001  | 0.001   | 0.00    | 0.00   | 0.00    | 0.00   | 0.00   |
|                                    | <b>Aquisphaera</b>         | 0.0007 | 0.0005 | 0.0007 | 0.0006 | 0.0002 | 0.0003 | 0.0006 | 0.0011 | 0.0008 | 0.0010 | 0.0003 | 0.0011 | 0.0007 | 0.0011 | 0.0009 | 0.0006  | 0.0005  | 0.0009 | 0.0008  | 0.0004 | 0.0006 |
|                                    | <b>AKAU3564</b>            | 0.00   | 0.00   | 0.00   | 0.00   | 0.00   | 0.00   | 0.00   | 0.00   | 0.00   | 0.00   | 0.00   | 0.00   | 0.0001 | 0.0001 | 0.00   | 0.00    | 0.00    | 0.00   | 0.00    | 0.00   | 0.0001 |
|                                    | <b>BD7-11</b>              | 0.0001 | 0.0001 | 0.00   | 0.00   | 0.00   | 0.00   | 0.0001 | 0.0002 | 0.0002 | 0.0001 | 0.0001 | 0.0001 | 0.00   | 0.00   | 0.0001 | 0.0001  | 0.0001  | 0.0001 | 0.00    | 0.0001 | 0.0001 |
|                                    | <b>Singulisphaera</b>      | 0.0004 | 0.0001 | 0.0003 | 0.0003 | 0.0001 | 0.0009 | 0.0003 | 0.0007 | 0.0011 | 0.0004 | 0.0008 | 0.0003 | 0.0004 | 0.0005 | 0.0004 | 0.0012  | 0.0003  | 0.0004 | 0.0006  | 0.0002 | 0.0014 |
|                                    | <b>I-8</b>                 | 0.00   | 0.00   | 0.00   | 0.00   | 0.00   | 0.00   | 0.00   | 0.00   | 0.00   | 0.00   | 0.00   | 0.00   | 0.00   | 0.00   | 0.00   | 0.00    | 0.0001  | 0.00   | 0.00    | 0.00   | 0.00   |
|                                    | <b>Isoosphaera</b>         | 0.0002 | 0.0001 | 0.0001 | 0.0001 | 0.0001 | 0.0001 | 0.00   | 0.00   | 0.00   | 0.003  | 0.0001 | 0.0001 | 0.00   | 0.0001 | 0.0001 | 0.00    | 0.00    | 0.00   | 0.0001  | 0.0001 | 0.0001 |
|                                    | <b>AKYG587</b>             | 0.00   | 0.00   | 0.00   | 0.00   | 0.00   | 0.00   | 0.00   | 0.00   | 0.00   | 0.00   | 0.00   | 0.00   | 0.00   | 0.00   | 0.00   | 0.00003 | 0.00    | 0.00   | 0.00    | 0.00   | 0.00   |
|                                    | <b>Phycisphaeraceae</b>    | 0.00   | 0.00   | 0.00   | 0.00   | 0.00   | 0.00   | 0.00   | 0.00   | 0.00   | 0.00   | 0.00   | 0.00   | 0.00   | 0.00   | 0.00   | 0.00    | 0.0001  | 0.0001 | 0.00    | 0.00   | 0.00   |
|                                    | <b>Tundrisphaera</b>       | 0.0004 | 0.0001 | 0.0001 | 0.00   | 0.00   | 0.00   | 0.0002 | 0.0003 | 0.0004 | 0.0001 | 0.00   | 0.00   | 0.00   | 0.0001 | 0.0001 | 0.0000  | 0.00    | 0.0000 | 0.0000  | 0.00   | 0.00   |
| <b>Dependentia</b>                 | <b>Babelliaceae</b>        | 0.00   | 0.0001 | 0.00   | 0.00   | 0.00   | 0.00   | 0.0001 | 0.0001 | 0.0001 | 0.00   | 0.00   | 0.00   | 0.0001 | 0.0001 | 0.0001 | 0.0001  | 0.0001  | 0.0001 | 0.0001  | 0.0001 | 0.0001 |
|                                    | <b>Vermiphilaceae</b>      | 0.00   | 0.00   | 0.0001 | 0.00   | 0.00   | 0.00   | 0.0001 | 0.0004 | 0.0002 | 0.0001 | 0.0001 | 0.0001 | 0.0001 | 0.0003 | 0.0001 | 0.0002  | 0.0001  | 0.0001 | 0.0005  | 0.00   | 0.0001 |
|                                    | <b>Babellales</b>          | 0.00   | 0.00   | 0.00   | 0.0001 | 0.00   | 0.00   | 0.00   | 0.00   | 0.0001 | 0.00   | 0.00   | 0.00   | 0.00   | 0.00   | 0.00   | 0.00    | 0.00    | 0.00   | 0.00    | 0.00   | 0.0001 |
|                                    | <b>UBA12411</b>            | 0.00   | 0.00   | 0.00   | 0.00   | 0.00   | 0.00   | 0.00   | 0.00   | 0.00   | 0.00   | 0.00   | 0.00   | 0.00   | 0.00   | 0.0001 | 0.00    | 0.00    | 0.00   | 0.00    | 0.00   | 0.00   |
|                                    | <b>UBA12409</b>            | 0.00   | 0.00   | 0.00   | 0.00   | 0.00   | 0.00   | 0.00   | 0.00   | 0.00   | 0.00   | 0.00   | 0.00   | 0.00   | 0.00   | 0.00   | 0.00    | 0.00003 | 0.00   | 0.00003 | 0.00   | 0.00   |
| <b>Mortierellomycota</b>           | <b>Mortierella</b>         | 0.0623 | 0.0480 | 0.0255 | 0.0087 | 0.0061 | 0.0071 | 0.0304 | 0.0309 | 0.0446 | 0.0257 | 0.0230 | 0.0150 | 0.0174 | 0.0401 | 0.0427 | 0.0121  | 0.0351  | 0.0132 | 0.0212  | 0.0082 | 0.0129 |
|                                    | <b>Mortierellomycota</b>   | 0.00   | 0.00   | 0.00   | 0.00   | 0.00   | 0.00   | 0.00   | 0.00   | 0.0001 | 0.00   | 0.00   | 0.00   | 0.00   | 0.00   | 0.00   | 0.00    | 0.0001  | 0.00   | 0.00    | 0.00   | 0.00   |
| <b>Zoopagomycota</b>               | <b>Syncephalis</b>         | 0.00   | 0.0002 | 0.0002 | 0.00   | 0.00   | 0.00   | 0.0002 | 0.0001 | 0.0001 | 0.00   | 0.0002 | 0.0002 | 0.00   | 0.00   | 0.0001 | 0.0001  | 0.0001  | 0.00   | 0.00    | 0.00   | 0.00   |
|                                    | <b>Acaulopage</b>          | 0.00   | 0.00   | 0.00   | 0.00   | 0.00   | 0.00   | 0.00   | 0.0001 | 0.00   | 0.00   | 0.00   | 0.00   | 0.00   | 0.0001 | 0.00   | 0.00    | 0.00    | 0.00   | 0.00    | 0.00   | 0.00   |
| <b>Piptoccephalidaceae</b>         | <b>Piptoccephalidaceae</b> | 0.0001 | 0.0001 | 0.00   | 0.00   | 0.00   | 0.0001 | 0.00   | 0.0002 | 0.00   | 0.0001 | 0.00   | 0.0001 | 0.00   | 0.0001 | 0.0001 | 0.00    | 0.0001  | 0.0001 | 0.00    | 0.00   | 0.00   |
|                                    | <b>Gemmatimonas</b>        | 0.0087 | 0.0064 | 0.0116 | 0.0095 | 0.0214 | 0.0221 | 0.0209 | 0.0261 | 0.0418 | 0.0297 | 0.0663 | 0.0193 | 0.0235 | 0.0226 | 0.0456 | 0.0649  | 0.0246  | 0.0202 | 0.0336  | 0.0709 | 0.0550 |
| <b>Gemmatimonadota</b>             | <b>Gemmatimonadaceae</b>   | 0.0054 | 0.0071 | 0.0082 | 0.0065 | 0.0085 | 0.0070 | 0.0130 | 0.0169 | 0.0243 | 0.0182 | 0.0257 | 0.0128 | 0.0171 | 0.0207 | 0.0312 | 0.0381  | 0.0183  | 0.0224 | 0.0343  | 0.0148 |        |
|                                    | <b>S0134</b>               | 0.0007 | 0.0005 | 0.0006 | 0.0006 | 0.0005 | 0.0006 | 0.0006 | 0.0007 | 0.0005 | 0.0004 | 0.0003 | 0.0003 | 0.0009 | 0.0006 | 0.0011 | 0.0005  | 0.0008  | 0.0006 | 0.0009  | 0.0007 |        |
|                                    | <b>Roseisolibacter</b>     | 0.0001 | 0.0001 | 0.0001 | 0.0001 | 0.0001 | 0.00   | 0.0001 | 0.0001 | 0.0001 | 0.0001 | 0.0001 | 0.0001 | 0.0001 | 0.0001 | 0.0001 | 0.00    | 0.0001  | 0.0001 | 0.0001  | 0.0001 | 0.0005 |
| <b>Bacteroidota</b>                | <b>Longimicrobiaceae</b>   | 0.0005 | 0.0003 | 0.0003 | 0.0001 | 0.0003 | 0.0002 | 0.0004 | 0.0005 | 0.0003 | 0.0003 | 0.0004 | 0.0003 | 0.0004 | 0.0004 | 0.0006 | 0.0003  | 0.0006  | 0.0006 | 0.0005  | 0.0008 | 0.0004 |
|                                    | <b>Mucilaginibacter</b>    | 0.0013 | 0.0011 | 0.0012 | 0.0011 | 0.0027 | 0.0066 | 0.0022 | 0.0005 | 0.0023 | 0.0032 | 0.0060 | 0.0006 | 0.0014 | 0.0025 | 0.0029 | 0.0043  | 0.0013  | 0.0011 | 0.0036  | 0.0084 | 0.0088 |
|                                    | <b>Edaphobaculum</b>       | 0.0002 | 0.0004 | 0.0004 | 0.0001 | 0.0033 | 0.0008 | 0.0005 | 0.0001 | 0.0029 | 0.0010 | 0.0044 | 0.0001 | 0.0002 | 0.0009 | 0.0012 | 0.0016  | 0.0004  | 0.0001 | 0.0007  | 0.0034 | 0.0040 |
|                                    | <b>Flavisolibacter</b>     | 0.0004 | 0.0001 | 0.00   | 0.0002 | 0.0010 | 0.0015 | 0.0005 | 0.0002 | 0.0020 | 0.0022 | 0.0082 | 0.0002 | 0.0002 | 0.0018 | 0.0021 | 0.0067  | 0.0004  | 0.0004 | 0.0011  | 0.0031 | 0.0066 |
|                                    | <b>env OPS_17</b>          | 0.00   | 0.00   | 0.0002 | 0.0015 | 0.0002 | 0.0007 | 0.00   | 0.00   | 0.0002 | 0.0001 | 0.0001 | 0.0001 | 0.00   | 0.00   | 0.0001 | 0.0002  | 0.00    | 0.00   | 0.00    | 0.00   | 0.0002 |
|                                    | <b>Chitinophagaceae</b>    | 0.0005 | 0.0010 | 0.0042 | 0.0007 | 0.0017 | 0.0028 | 0.0005 | 0.0011 | 0.0023 | 0.0030 | 0.0219 | 0.0004 | 0.0003 | 0.0020 | 0.0037 | 0.0194  | 0.0013  | 0.0021 | 0.0013  | 0.0083 | 0.0274 |
|                                    | <b>Chitinophagales</b>     | 0.0001 | 0.0002 | 0.0004 | 0.0002 | 0.0013 | 0.0012 | 0.0002 | 0.0006 | 0.0015 | 0.0014 | 0.0016 | 0.0009 | 0.0006 | 0.0014 | 0.0004 | 0.0016  | 0.0014  | 0.0009 | 0.0015  | 0.0011 | 0.0009 |
|                                    | <b>Flavobacterium</b>      | 0.00   | 0.0002 | 0.0001 | 0.0001 | 0.00   | 0.0001 | 0.00   | 0.00   | 0.0002 | 0.00   | 0.00   | 0.00   | 0.0004 | 0.00   | 0.00   | 0.00    | 0.00    | 0.00   | 0.00    | 0.00   | 0.0002 |
|                                    | <b>Kapabacteriales</b>     | 0.0002 | 0.0002 | 0.0002 | 0.0001 | 0.0002 | 0.0001 | 0.0003 | 0.0001 | 0.0014 | 0.0005 | 0.0001 | 0.0004 | 0.0001 | 0.0004 | 0.00   | 0.0001  | 0.0007  | 0.0001 | 0.0010  | 0.0004 | 0.00   |
|                                    | <b>Sporocytophaga</b>      | 0.0001 | 0.0001 | 0.00   | 0.00   | 0.00   | 0.00   | 0.0001 | 0.00   | 0.00   | 0.0002 | 0.0001 | 0.00   | 0.00   | 0.0001 | 0.0004 | 0.0002  | 0.0003  | 0.0013 | 0.00    | 0.0001 | 0.0003 |
| <b>Puia</b>                        | 0.0001                     | 0.0001 | 0.00   | 0.00   | 0.00   | 0.00   | 0.0001 | 0.00   | 0.00   | 0.0002 | 0.0001 | 0.00   | 0.00   | 0.0001 | 0.0004 | 0.0002 | 0.0003  | 0.0013  | 0.00   | 0.0001  | 0.0003 |        |
| <b>Myxococcota</b>                 | <b>Haliangium</b>          | 0.0018 | 0.0009 | 0.0004 | 0.0007 | 0.0014 | 0.0010 | 0.0024 | 0.0027 | 0.0042 | 0.0015 | 0.0019 | 0.0019 | 0.0026 | 0.0038 | 0.0014 | 0.0025  | 0.0025  | 0.0021 | 0.0029  | 0.0022 | 0.0020 |
|                                    | <b>Anaeromyxobacter</b>    | 0.0004 | 0.0001 | 0.0004 | 0.0002 | 0.0004 | 0.0001 | 0.0006 | 0.0004 | 0.0005 | 0.0002 | 0.0004 | 0.0006 | 0.0003 | 0.0003 | 0.0002 | 0.0006  | 0.0002  | 0.0005 | 0.0001  | 0.0003 | 0.0003 |
|                                    | <b>P3OB-42</b>             | 0.0005 | 0.0001 | 0.0004 | 0.0001 | 0.0001 | 0.0002 | 0.0002 | 0.0001 | 0.0003 | 0.0003 | 0.0003 | 0.0003 | 0.0003 | 0.0001 | 0.0002 | 0.0002  | 0.0002  | 0.0004 | 0.0001  | 0.0004 | 0.0002 |
|                                    | <b>Pajaroellobacter</b>    | 0.0009 | 0.0006 | 0.0006 | 0.0005 | 0.0010 | 0.0005 | 0.0006 | 0.0012 | 0.0018 | 0.0003 | 0.0081 | 0.0006 | 0.0006 | 0.0012 | 0.0014 | 0.0038  | 0.0014  | 0.0009 | 0.0010  | 0.0052 | 0.0095 |
|                                    | <b>mle1-27</b>             | 0.0001 | 0.0001 | 0.00   | 0.00   | 0.0001 | 0.0001 | 0.0001 | 0.0001 | 0.00   | 0.0001 | 0.00   | 0.0001 | 0.0001 | 0.0001 | 0.0001 | 0.0002  | 0.0001  | 0.00   | 0.00</  |        |        |

**Table S2** RDA analysis of sensitive and tolerant of microbial communities with chemical fractions of La, Ce and F under different interactions.

| Tr     | Sensitive microbial community |         |                |           |           |         |                |           | Tolerant microbial community |         |                |           |           |         |                |           |           |
|--------|-------------------------------|---------|----------------|-----------|-----------|---------|----------------|-----------|------------------------------|---------|----------------|-----------|-----------|---------|----------------|-----------|-----------|
|        | bacteria                      |         |                |           | fungus    |         |                |           | bacteria                     |         |                |           | Fungus    |         |                |           |           |
|        | RDA1                          | RDA2    | r <sup>2</sup> | Pr(>r)    | RDA1      | RDA2    | r <sup>2</sup> | Pr(>r)    | RDA1                         | RDA2    | r <sup>2</sup> | Pr(>r)    | RDA1      | RDA2    | r <sup>2</sup> | Pr(>r)    |           |
| LC     | La_WS                         | -0.6351 | -0.7725        | 0.5692    | 0.002 **  | 0.4543  | -0.8908        | 0.9034    | 0.001 ***                    | 0.8877  | -0.4604        | 0.4126    | 0.027 *   | 0.9417  | 0.3366         | 0.2485    | 0.1140    |
|        | La_EX                         | -0.6338 | -0.7735        | 0.5261    | 0.004 **  | 0.4411  | -0.8975        | 0.8534    | 0.001 ***                    | 0.8791  | -0.4766        | 0.4997    | 0.010 **  | 0.9744  | 0.2249         | 0.3006    | 0.0690    |
|        | La_CAR                        | -0.8404 | -0.5420        | 0.5591    | 0.002 **  | 0.5561  | -0.8311        | 0.8982    | 0.001 ***                    | 0.7945  | -0.6072        | 0.4737    | 0.012 *   | 0.9787  | 0.2051         | 0.2027    | 0.1810    |
|        | La_FeMn                       | -0.7354 | -0.6776        | 0.5863    | 0.002 **  | 0.4832  | -0.8755        | 0.9075    | 0.001 ***                    | 0.8525  | -0.5227        | 0.4314    | 0.021 *   | 0.9576  | 0.2880         | 0.2530    | 0.1060    |
|        | La_ORG                        | -0.5393 | -0.8421        | 0.4378    | 0.002 **  | 0.3311  | -0.9436        | 0.7260    | 0.001 ***                    | 0.9118  | -0.4107        | 0.6251    | 0.002 **  | 0.9869  | 0.1614         | 0.4304    | 0.020 *   |
|        | La_RES                        | 0.7158  | 0.6983         | 0.3787    | 0.022 *   | -0.5182 | 0.8553         | 0.6619    | 0.002 **                     | -0.7938 | 0.6082         | 0.6700    | 0.001 *** | -0.9935 | 0.1139         | 0.3851    | 0.035 *   |
|        | Ce_WS                         | -0.5514 | -0.8342        | 0.5106    | 0.008 **  | 0.4273  | -0.9041        | 0.8780    | 0.001 ***                    | 0.9132  | -0.4076        | 0.4726    | 0.012 *   | 0.9408  | 0.3390         | 0.2552    | 0.1140    |
|        | Ce_EX                         | -0.5488 | -0.8360        | 0.5523    | 0.004 **  | 0.3916  | -0.9202        | 0.8461    | 0.001 ***                    | 0.9118  | -0.4107        | 0.4643    | 0.015 *   | 0.9590  | 0.2835         | 0.3198    | 0.0520    |
|        | Ce_CAR                        | -0.6998 | -0.7144        | 0.5574    | 0.002 **  | 0.4708  | -0.8823        | 0.9089    | 0.001 ***                    | 0.8708  | -0.4916        | 0.4527    | 0.017 *   | 0.9525  | 0.3046         | 0.2530    | 0.1060    |
|        | Ce_FeMn                       | -0.7426 | -0.6697        | 0.5621    | 0.002 **  | 0.4915  | -0.8709        | 0.9155    | 0.001 ***                    | 0.8547  | -0.5191        | 0.4510    | 0.018 *   | 0.9544  | 0.2985         | 0.2384    | 0.1250    |
|        | Ce_ORG                        | -0.7373 | -0.6756        | 0.4895    | 0.004 **  | 0.4623  | -0.8867        | 0.8821    | 0.001 ***                    | 0.8930  | -0.4501        | 0.6067    | 0.003 **  | 0.9502  | 0.3117         | 0.2460    | 0.1230    |
|        | Ce_RES                        | -0.8833 | -0.4688        | 0.6009    | 0.002 **  | 0.5866  | -0.8099        | 0.8798    | 0.001 ***                    | 0.7124  | -0.7018        | 0.3171    | 0.0760    | 0.9605  | 0.2783         | 0.1646    | 0.2350    |
| CF     | Ce_WS                         | -0.9993 | -0.0378        | 0.9349    | 0.001 *** | 0.4988  | 0.8667         | 0.2474    | 0.1100                       | 0.9792  | 0.2027         | 0.8803    | 0.001 *** | -0.6662 | 0.7458         | 0.5601    | 0.005 **  |
|        | Ce_EX                         | -0.9943 | 0.1068         | 0.8819    | 0.001 *** | 0.4287  | 0.9035         | 0.3742    | 0.034 *                      | 0.8943  | 0.4474         | 0.8702    | 0.001 *** | -0.6387 | 0.7695         | 0.6989    | 0.002 **  |
|        | Ce_CAR                        | -0.9997 | -0.0250        | 0.9423    | 0.001 *** | 0.5022  | 0.8648         | 0.2503    | 0.1080                       | 0.9818  | 0.1898         | 0.8805    | 0.001 *** | -0.6714 | 0.7411         | 0.5734    | 0.004 **  |
|        | Ce_FeMn                       | -1.0000 | -0.0064        | 0.9433    | 0.001 *** | 0.4849  | 0.8746         | 0.2420    | 0.1160                       | 0.9816  | 0.1911         | 0.8860    | 0.001 *** | -0.6609 | 0.7505         | 0.5875    | 0.003 **  |
|        | Ce_ORG                        | -0.9937 | 0.1125         | 0.8864    | 0.001 *** | 0.4394  | 0.8983         | 0.3089    | 0.044 *                      | 0.9140  | 0.4057         | 0.9010    | 0.001 *** | -0.6378 | 0.7702         | 0.7017    | 0.001 *** |
|        | Ce_RES                        | -0.9727 | -0.2322        | 0.8893    | 0.001 *** | 0.6686  | 0.7437         | 0.1206    | 0.3960                       | 0.9794  | -0.2018        | 0.8723    | 0.001 *** | -0.7539 | 0.6570         | 0.3072    | 0.0620    |
|        | F_WS                          | -0.9961 | -0.0884        | 0.8813    | 0.001 *** | 0.6527  | 0.7576         | 0.1074    | 0.4390                       | 0.9979  | -0.0647        | 0.9352    | 0.001 *** | -0.7144 | 0.6997         | 0.4451    | 0.012 *   |
|        | F_EX                          | -0.9805 | 0.1967         | 0.8933    | 0.001 *** | 0.5172  | 0.8559         | 0.1674    | 0.2480                       | 0.9626  | 0.2708         | 0.9556    | 0.001 *** | -0.6629 | 0.7487         | 0.7529    | 0.001 *** |
|        | F_FeMn                        | -0.9967 | 0.0818         | 0.9045    | 0.001 *** | 0.5550  | 0.8319         | 0.1863    | 0.2110                       | 0.9780  | 0.2085         | 0.9438    | 0.001 *** | -0.6832 | 0.7302         | 0.6606    | 0.001 *** |
|        | F_ORG                         | -0.9989 | 0.0463         | 0.8581    | 0.001 *** | 0.6526  | 0.7577         | 0.2714    | 0.044 *                      | 0.9495  | 0.3139         | 0.9350    | 0.001 *** | -0.7488 | 0.6628         | 0.6666    | 0.001 *** |
|        | F_RES                         | -0.9579 | 0.2873         | 0.8872    | 0.001 *** | 0.4038  | 0.9149         | 0.2688    | 0.1010                       | 0.8910  | 0.4540         | 0.9181    | 0.001 *** | -0.6258 | 0.7800         | 0.8398    | 0.001 *** |
|        | Ce_WS                         | -0.9993 | -0.0378        | 0.9349    | 0.001 *** | 0.4988  | 0.8667         | 0.2474    | 0.1100                       | 0.9792  | 0.2027         | 0.8803    | 0.001 *** | -0.6662 | 0.7458         | 0.5601    | 0.005 **  |
| LF     | La_WS                         | 0.9999  | -0.0124        | 0.9294    | 0.001 *** | -0.8308 | -0.5566        | 0.0127    | 0.8940                       | 0.9950  | 0.1000         | 0.9592    | 0.001 *** | 0.8924  | -0.4513        | 0.5905    | 0.009 **  |
|        | La_EX                         | 0.9986  | 0.0528         | 0.8948    | 0.001 *** | -0.4581 | 0.8889         | 0.0085    | 0.9390                       | 0.9999  | -0.0123        | 0.9635    | 0.001 *** | 0.8968  | -0.4425        | 0.7057    | 0.002 **  |
|        | La_CAR                        | 0.9910  | 0.1340         | 0.9364    | 0.001 *** | 0.2108  | 0.9775         | 0.0164    | 0.8910                       | 0.9983  | 0.0579         | 0.8953    | 0.001 *** | 0.8309  | -0.5565        | 0.7116    | 0.001 *** |
|        | La_FeMn                       | 0.9949  | 0.1006         | 0.9315    | 0.001 *** | -0.2919 | 0.9565         | 0.0080    | 0.9460                       | 0.9991  | 0.0430         | 0.9300    | 0.001 *** | 0.8641  | -0.5033        | 0.7048    | 0.001 *** |
|        | La_ORG                        | 0.9848  | 0.1740         | 0.9208    | 0.001 *** | 0.2548  | 0.9670         | 0.0616    | 0.6240                       | 0.9985  | 0.0542         | 0.8542    | 0.001 *** | 0.8408  | -0.5414        | 0.7260    | 0.001 *** |
|        | La_RES                        | 0.8307  | 0.5567         | 0.6740    | 0.001 *** | -0.9366 | 0.3505         | 0.5556    | 0.004 **                     | 0.7848  | 0.6198         | 0.4346    | 0.023 *   | 0.9939  | 0.1107         | 0.5776    | 0.004 **  |
|        | F_WS                          | 0.9995  | 0.0311         | 0.8284    | 0.001 *** | 0.4119  | 0.9112         | 0.0316    | 0.7780                       | 0.9957  | -0.0932        | 0.9535    | 0.001 *** | 0.8794  | -0.4761        | 0.7029    | 0.002 **  |
|        | F_EX                          | 1.0000  | 0.0092         | 0.8126    | 0.001 *** | -0.4533 | 0.8914         | 0.0231    | 0.8390                       | 0.9955  | -0.0949        | 0.9763    | 0.001 *** | 0.9451  | -0.3268        | 0.7239    | 0.001 *** |
|        | F_FeMn                        | 0.9904  | 0.1379         | 0.8897    | 0.001 *** | 0.4379  | 0.8990         | 0.0399    | 0.7340                       | 0.9999  | -0.0164        | 0.8872    | 0.001 *** | 0.8223  | -0.5691        | 0.7390    | 0.001 *** |
|        | F_ORG                         | 0.9994  | 0.0358         | 0.8273    | 0.001 *** | -0.2289 | 0.9735         | 0.0532    | 0.6560                       | 0.9986  | -0.0525        | 0.9441    | 0.001 *** | 0.9533  | -0.3021        | 0.7275    | 0.001 *** |
|        | F_RES                         | 0.9844  | 0.1760         | 0.8754    | 0.001 *** | -0.5521 | 0.8338         | 0.0963    | 0.045 *                      | 1.0000  | 0.0015         | 0.8889    | 0.001 *** | 0.9588  | -0.2842        | 0.8141    | 0.001 *** |
|        | Ce_WS                         | 0.9999  | -0.0124        | 0.9294    | 0.001 *** | -0.8308 | -0.5566        | 0.0127    | 0.8940                       | 0.9950  | 0.1000         | 0.9592    | 0.001 *** | 0.8924  | -0.4513        | 0.5905    | 0.009 **  |
| LCF    | La_WS                         | 1.0000  | -0.0015        | 0.9155    | 0.001 *** | 1.0000  | -0.0024        | 0.6638    | 0.001 ***                    | 0.9862  | 0.1653         | 0.9290    | 0.001 *** | 0.8576  | -0.5144        | 0.9210    | 0.001 *** |
|        | La_EX                         | 0.9920  | -0.1261        | 0.8671    | 0.001 *** | 1.0000  | -0.0035        | 0.6769    | 0.001 ***                    | 0.9838  | 0.1791         | 0.9730    | 0.001 *** | 0.9348  | -0.3553        | 0.8533    | 0.001 *** |
|        | La_CAR                        | 0.9792  | -0.2031        | 0.9300    | 0.001 *** | 0.9997  | 0.0266         | 0.5576    | 0.003 **                     | 0.9999  | 0.0152         | 0.9801    | 0.001 *** | 0.8720  | -0.4895        | 0.8515    | 0.001 *** |
|        | La_FeMn                       | 0.9814  | -0.1919        | 0.9375    | 0.001 *** | 0.9960  | 0.0893         | 0.6061    | 0.002 **                     | 0.9980  | 0.0641         | 0.9918    | 0.001 *** | 0.8901  | -0.4557        | 0.8814    | 0.001 *** |
|        | La_ORG                        | 0.9859  | -0.1673        | 0.9312    | 0.001 *** | 0.9991  | 0.0436         | 0.6106    | 0.002 **                     | 0.9978  | 0.0663         | 0.9865    | 0.001 *** | 0.8857  | -0.4643        | 0.8744    | 0.001 *** |
|        | La_RES                        | 0.9884  | 0.1522         | 0.9274    | 0.001 *** | 0.9863  | 0.1650         | 0.6935    | 0.001 ***                    | 0.9763  | -0.2167        | 0.8075    | 0.001 *** | 0.5973  | -0.8020        | 0.7537    | 0.001 *** |
|        | Ce_WS                         | 0.9877  | -0.1562        | 0.9211    | 0.001 *** | 0.9989  | -0.0470        | 0.5500    | 0.004 **                     | 0.9998  | 0.0225         | 0.9611    | 0.001 *** | 0.8505  | -0.5261        | 0.8685    | 0.001 *** |
|        | Ce_EX                         | 0.9979  | -0.0648        | 0.8999    | 0.001 *** | 0.9997  | 0.0261         | 0.7233    | 0.001 ***                    | 0.9808  | 0.1948         | 0.9829    | 0.001 *** | 0.9176  | -0.3974        | 0.8898    | 0.001 *** |
|        | Ce_CAR                        | 0.9993  | -0.0382        | 0.9293    | 0.001 *** | 0.9993  | 0.0369         | 0.7160    | 0.001 ***                    | 0.9857  | 0.1684         | 0.9755    | 0.001 *** | 0.8886  | -0.4588        | 0.9119    | 0.001 *** |
|        | Ce_FeMn                       | 0.9962  | -0.0877        | 0.9218    | 0.001 *** | 0.9998  | 0.0224         | 0.6905    | 0.001 ***                    | 0.9921  | 0.1255         | 0.9809    | 0.001 *** | 0.8955  | -0.4452        | 0.8746    | 0.001 *** |
|        | Ce_ORG                        | 0.9998  | -0.0216        | 0.9118    | 0.001 *** | 0.9999  | 0.0162         | 0.7312    | 0.001 ***                    | 0.9794  | 0.2019         | 0.9724    | 0.001 *** | 0.9015  | -0.4328        | 0.9041    | 0.001 *** |
|        | Ce_RES                        | 0.8811  | -0.4730        | 0.8307    | 0.001 *** | 0.9995  | -0.0317        | 0.2136    | 0.1820                       | 0.9470  | -0.3213        | 0.8862    | 0.001 *** | 0.7736  | -0.6337        | 0.5873    | 0.001 *** |
| F_WS   | 0.9624                        | -0.2718 | 0.8293         | 0.001 *** | 0.9997    | -0.0257 | 0.5369         | 0.004 **  | 0.9874                       | 0.1581  | 0.9427         | 0.001 *** | 0.9542    | -0.2992 | 0.8313         | 0.001 *** |           |
| F_EX   | 0.9966                        | -0.0824 | 0.8643         | 0.001 *** | 1.0000    | 0.0085  | 0.7156         | 0.001 *** | 0.9720                       | 0.2350  | 0.9825         | 0.001 *** | 0.9397    | -0.3419 | 0.8853         | 0.001 *** |           |
| F_FeMn | 0.9996                        | 0.0292  | 0.7886         | 0.001 *** | 0.9978    | 0.0661  | 0.8321         | 0.001 *** | 0.9215                       | 0.3884  | 0.9753         | 0.001 *** | 0.9721    | -0.2344 | 0.8742         | 0.001 *** |           |
| F_ORG  | 0.9644                        | -0.2645 | 0.8531         | 0.001 *** | 1.0000    | 0.0064  | 0.5457         | 0.004 **  | 0.9955                       | 0.0948  | 0.9438         | 0.001 *** | 0.9380    | -0.3466 | 0.7991         | 0.001 *** |           |
| F_RES  | 0.9998                        | -0.0202 | 0.8744         | 0.001 *** | 1.0000    | 0.0039  | 0.7760         | 0.001 *** | 0.9812                       | 0.1932  | 0.9542         | 0.001 *** | 0.9261    | -0.3772 | 0.8168         | 0.001 *** |           |

Abbreviations: La, lanthanum; Ce, cerium; F, fluorine; CK, control; LC, La + Ce contaminated soil; CF, Ce + F contaminated soil; LF, La + F contaminated soil; LCF, La + Ce + F contaminated soil; WS, water-soluble form; EX,

exchangeable form; CAR carbonate-bound form; FeMn, iron-manganese-bound form; ORG, organic-bound form; RES, residual form.

**Table S3** Relative abundance change (%) of bacterial and fungal microbes in soil microbial community.

| Taxon | LC1   | LC2   | LC3   | LC4   | LC5   | CF1   | CF2   | CF3   | CF4   | CF5   | LF1   | LF2   | LF3   | LF4   | LF5   | LCF1  | LCF2  | LCF3  | LCF4  | LCF5  |
|-------|-------|-------|-------|-------|-------|-------|-------|-------|-------|-------|-------|-------|-------|-------|-------|-------|-------|-------|-------|-------|
| B1    | -0.07 | -0.12 | 0.13  | -0.51 | -0.29 | -0.23 | -0.12 | -0.36 | -0.10 | -0.68 | -0.16 | -0.26 | -0.26 | -0.46 | -0.48 | -0.20 | -0.22 | -0.42 | -0.74 | -0.58 |
| B2    | -0.28 | -0.23 | -0.36 | 0.10  | -0.16 | -0.02 | -0.17 | 0.16  | 0.05  | 0.93  | -0.24 | -0.01 | 0.23  | 0.46  | 0.40  | -0.10 | -0.13 | 0.13  | 0.73  | 0.41  |
| B3    | 0.05  | 0.11  | 0.17  | 0.40  | 0.07  | -0.01 | -0.12 | -0.16 | -0.50 | -0.29 | -0.26 | 0.07  | -0.17 | -0.30 | -0.22 | -0.01 | 0.01  | -0.02 | -0.06 | -0.09 |
| B4    | 0.71  | 0.38  | 0.40  | -0.28 | 0.53  | 0.68  | 0.53  | 0.00  | 0.61  | -0.42 | 1.08  | 0.28  | -0.08 | -0.32 | -0.20 | 0.39  | 0.29  | 0.31  | -0.55 | -0.13 |
| B5    | -0.33 | -0.43 | -0.48 | -0.55 | -0.61 | -0.13 | 0.22  | 0.29  | 0.48  | 0.05  | 0.61  | 0.09  | 0.34  | 0.52  | 0.26  | -0.01 | -0.10 | 0.20  | 0.03  | 0.10  |
| B6    | -0.31 | -0.21 | -0.35 | -0.12 | -0.17 | -0.26 | -0.31 | -0.27 | -0.28 | -0.26 | -0.34 | -0.07 | 0.02  | 0.04  | -0.33 | -0.14 | 0.04  | 0.00  | 0.15  | -0.05 |
| B7    | -0.49 | -0.43 | -0.55 | -0.83 | -0.71 | -0.17 | 0.50  | 0.33  | -0.37 | -0.70 | -0.08 | -0.17 | 0.01  | 0.39  | -0.21 | -0.36 | -0.09 | -0.30 | -0.78 | -0.58 |
| B8    | -0.15 | 0.02  | -0.02 | 0.79  | 0.78  | 1.04  | 1.65  | 2.98  | 1.85  | 4.51  | 0.95  | 1.47  | 1.65  | 3.65  | 5.16  | 1.62  | 1.36  | 2.42  | 5.31  | 3.28  |
| B9    | 3.47  | 7.87  | 3.57  | 14.62 | 12.72 | 0.58  | 0.07  | 1.38  | 0.72  | -0.40 | 0.19  | 0.89  | 0.48  | -0.12 | 0.16  | 2.23  | 2.05  | 0.76  | 0.86  | -0.31 |
| B10   | 3.03  | -0.04 | 1.33  | -0.47 | -0.46 | 0.73  | 0.33  | -0.10 | 0.01  | -0.10 | 0.06  | 0.62  | -0.19 | 0.33  | 0.01  | 0.14  | 2.43  | 0.49  | -0.80 | -0.60 |
| B11   | -0.49 | -0.41 | -0.58 | -0.22 | -0.37 | 0.07  | 0.12  | 0.66  | -0.34 | 1.22  | -0.13 | -0.10 | 0.27  | -0.03 | 0.72  | 0.21  | 0.05  | 0.15  | 0.72  | 1.58  |
| B12   | 1.26  | 4.14  | 0.90  | 3.87  | 3.76  | 1.50  | 0.79  | 5.82  | 2.71  | 12.18 | 0.60  | 0.82  | 3.04  | 5.57  | 9.23  | 3.35  | 3.18  | 3.48  | 10.28 | 15.70 |
| B13   | -0.54 | -0.17 | -0.53 | -0.70 | -0.66 | -0.09 | 0.21  | 0.65  | -0.49 | -0.78 | 0.02  | -0.17 | 0.03  | -0.16 | -0.61 | -0.32 | -0.16 | -0.37 | -0.83 | -0.70 |
| B14   | -0.50 | -0.56 | -0.50 | -0.25 | -0.65 | -0.35 | -0.57 | -0.58 | -0.73 | -0.66 | -0.50 | -0.61 | -0.58 | -0.59 | -0.60 | -0.21 | -0.56 | -0.71 | -0.59 | -0.64 |
| B15   | -0.81 | -0.38 | -0.73 | -0.68 | -0.80 | -0.65 | -0.48 | -0.46 | -0.70 | -0.63 | -0.53 | -0.18 | -0.44 | -0.39 | -0.63 | -0.51 | -0.61 | -0.58 | -0.46 | -0.46 |
| B16   | -0.75 | -0.42 | -0.74 | -0.89 | -0.90 | -0.47 | 0.06  | 1.06  | 0.05  | 0.17  | -0.31 | -0.70 | 0.88  | 0.14  | -0.02 | -0.68 | -0.41 | -0.51 | -0.60 | 1.81  |
| B17   | -0.67 | -0.50 | -0.65 | -0.88 | -0.55 | -0.33 | 0.79  | 1.15  | 0.60  | -0.27 | -0.26 | -0.30 | 0.42  | 0.20  | 0.60  | -0.63 | -0.24 | 0.49  | -0.63 | 0.82  |
| B18   | -0.66 | -0.32 | -0.56 | -0.36 | -0.88 | -0.37 | -0.01 | 0.14  | -0.55 | -0.79 | -0.12 | 0.42  | -0.42 | -0.43 | -0.60 | -0.18 | 0.19  | -0.20 | -0.27 | -0.55 |
| B19   | -0.02 | 0.10  | -0.16 | -0.17 | -0.79 | 0.14  | 0.26  | -0.15 | -0.32 | -0.50 | -0.18 | 0.48  | -0.04 | -0.48 | -0.81 | -0.35 | 0.23  | -0.38 | -0.36 | -0.38 |
| B20   | 0.55  | 0.18  | -0.08 | -0.82 | -1.00 | 0.87  | -0.04 | -0.07 | -0.92 | -0.95 | 0.17  | 0.07  | -0.61 | -0.89 | -0.67 | 1.02  | -0.06 | -0.74 | -0.88 | -0.96 |
| B21   | -0.91 | -0.75 | -0.72 | -0.91 | -0.77 | -0.08 | -0.61 | -0.62 | -0.43 | -0.83 | 0.32  | -0.55 | -0.79 | -0.35 | -0.65 | -0.05 | -0.77 | -0.73 | -0.91 | -0.66 |
| B22   | -0.61 | -0.63 | -0.59 | -0.87 | -0.86 | -0.26 | 1.27  | 0.93  | -0.16 | -0.51 | -0.31 | 1.62  | -0.13 | 0.66  | 1.03  | 0.59  | 2.34  | -0.46 | -0.45 | 0.14  |
| B23   | 0.68  | 0.37  | -1.00 | -0.38 | -0.78 | 1.16  | -0.40 | -0.56 | 2.35  | -0.22 | -0.78 | 0.46  | -0.01 | -0.39 | -0.31 | 0.69  | -0.57 | 3.27  | -0.56 | -0.77 |
| B24   | 32.16 | 1.05  | -0.49 | -0.04 | -0.75 | -1.00 | -0.07 | -0.75 | -0.48 | -1.00 | -1.00 | -0.51 | -0.77 | -1.00 | -0.46 | -0.26 | -0.26 | -1.00 | -0.49 | -0.21 |
| B25   | -0.33 | 0.88  | -0.65 | -1.00 | -0.31 | -0.06 | -0.36 | -1.00 | -0.64 | -0.58 | -0.65 | -0.67 | -0.68 | -1.00 | 0.11  | 0.02  | -0.66 | 1.04  | -0.65 | -0.64 |
| B26   | -1.00 | 0.25  | -1.00 | -1.00 | -1.00 | -1.00 | -1.00 | -1.00 | -1.00 | -1.00 | -1.00 | -1.00 | -1.00 | -1.00 | 1.22  | -1.00 | 1.04  | -1.00 | 1.11  | -1.00 |
| B27   | -1.00 | -1.00 | -1.00 | -1.00 | -1.00 | -1.00 | 2.26  | 13.21 | 18.52 | 25.22 | -1.00 | -1.00 | 7.38  | 26.64 | 43.25 | -1.00 | 0.38  | 10.05 | 12.55 | 59.12 |
| B28   | 7.52  | -1.00 | -1.00 | -1.00 | -1.00 | 9.64  | 4.44  | -1.00 | -1.00 | -1.00 | -1.00 | -1.00 | -1.00 | -1.00 | -1.00 | 56.34 | -1.00 | -1.00 | -1.00 | -1.00 |
| G1    | 0.00  | -0.09 | 0.08  | -0.05 | 0.00  | 0.03  | -0.02 | -0.02 | 0.01  | 0.06  | 0.11  | 0.03  | -0.01 | -0.09 | 0.09  | 0.00  | 0.04  | 0.01  | -0.02 | -0.02 |
| G2    | -0.20 | -0.20 | -0.38 | -0.42 | 0.03  | -0.18 | -0.21 | 0.13  | -0.16 | -0.30 | -0.47 | -0.03 | -0.08 | -0.21 | -0.46 | -0.14 | -0.19 | -0.36 | -0.12 | -0.30 |
| G3    | -0.25 | -0.62 | -0.87 | -0.90 | -0.89 | -0.55 | -0.51 | -0.32 | -0.61 | -0.65 | -0.78 | -0.72 | -0.38 | -0.34 | -0.81 | -0.47 | -0.81 | -0.68 | -0.87 | -0.80 |
| G4    | 3.75  | 14.35 | 3.94  | 15.56 | 5.75  | 1.71  | 2.78  | 2.06  | 0.54  | 0.17  | 1.08  | 1.52  | 1.93  | 7.29  | 0.10  | 1.14  | 2.03  | 1.39  | 0.60  | 0.52  |
| G5    | 0.19  | 4.46  | 1.08  | 4.79  | 2.75  | 4.63  | 14.76 | 2.99  | 12.62 | 8.26  | 0.19  | 5.92  | 9.06  | 17.98 | 7.59  | 11.87 | 6.63  | 21.14 | 27.58 | 29.71 |
| G6    | 0.12  | -0.87 | -0.82 | -0.92 | -0.76 | 0.74  | 0.68  | -0.49 | 0.23  | 0.06  | 0.35  | -0.75 | -0.53 | -0.70 | -0.38 | -0.57 | -0.44 | 0.00  | -0.36 | -0.21 |
| G7    | -0.90 | -0.53 | -0.87 | -0.74 | -0.96 | -1.00 | 1.04  | -0.92 | -0.49 | -0.47 | -0.76 | -0.79 | -0.72 | -0.65 | -0.85 | -0.23 | -1.00 | -0.85 | -0.54 | -0.62 |
| G8    | 1.32  | -0.56 | -0.35 | -0.26 | -0.31 | -0.51 | 0.00  | 0.71  | 0.15  | -0.17 | 0.24  | -0.18 | 1.42  | 1.57  | -0.75 | -0.35 | 0.07  | 0.38  | 0.01  | -0.23 |
| G9    | -0.41 | -0.47 | -0.90 | -0.86 | -0.62 | -0.42 | -0.04 | -0.66 | -0.55 | -0.32 | -0.59 | -0.73 | -0.47 | -0.73 | -0.52 | 0.12  | -0.64 | -1.00 | -1.00 | -0.93 |
| G10   | 3.08  | 0.67  | -0.75 | 0.52  | 0.45  | 2.15  | 0.90  | 0.34  | 0.54  | -0.20 | 0.51  | 1.84  | -0.45 | 2.65  | 7.29  | 0.48  | -0.14 | -0.46 | 0.06  | 0.60  |
| G11   | 0.41  | -0.77 | 2.31  | -0.59 | 0.84  | -1.00 | -1.00 | 5.83  | 3.99  | 0.13  | -0.12 | -0.42 | -1.00 | 3.14  | 0.25  | -1.00 | 0.55  | -1.00 | -1.00 | -0.36 |
| G12   | -1.00 | -1.00 | -1.00 | -1.00 | -1.00 | -1.00 | -1.00 | -1.00 | -1.00 | -1.00 | -1.00 | -1.00 | -1.00 | -1.00 | -1.00 | -1.00 | -1.00 | -1.00 | -1.00 | -1.00 |
| G13   | -1.00 | -1.00 | -1.00 | -1.00 | -1.00 | -1.00 | -1.00 | -1.00 | -1.00 | -1.00 | -1.00 | -1.00 | -1.00 | -1.00 | -1.00 | -1.00 | -1.00 | -1.00 | -1.00 | -1.00 |
| G14   | -1.00 | -1.00 | -1.00 | -1.00 | -1.00 | -1.00 | 0.34  | -1.00 | 1.93  | -1.00 | -1.00 | -1.00 | -1.00 | 0.33  | -0.06 | -1.00 | -1.00 | 2.82  | -1.00 | 0.44  |
| G15   | -1.00 | 7.20  | -1.00 | 2.73  | -1.00 | 3.51  | -1.00 | 4.35  | -1.00 | -1.00 | 0.98  | -1.00 | -1.00 | -1.00 | -1.00 | -1.00 | 5.99  | -1.00 | -1.00 | -1.00 |

Abbreviations: La, lanthanum; Ce, cerium; F, fluorine; LC, La + Ce contaminated soil; CF, Ce + F contaminated soil; LF, La + F contaminated soil; LCF, La + Ce + F contaminated soil; B1, Chloroflexi; B2, Proteobacteria; B3, Actinobacteriota; B4, WPS\_2; B5, Acidobacteriota; B6, Firmicutes; B7, Planctomycetota; B8, Gemmatimonadota; B9, Patescibacteria; B10, Cyanobacteria; B11, Myxococcota; B12, Bacteroidota; B13, unclassified-k-norank-d-bacteria; B14, Bdellovibrionota; B15, Desulfobacterota; B16, Armatimonadota; B17, Verrucomicrobiota; B18, Sumerlaeota; B19, RCP2-54; B20, Nitrospirota; B21, Elusimicrobiota; B22, Dependientiae; B23, Halanaerobiaeota; B24, Deinococcota; B25, GAL15; B26, WS4; B27, Abditibacteriota; B28, FCPU426. Fungal phyla: G1, Ascomycota; G2, Basidiomycota; G3, Mortierellomycota; G4, unclassified\_k fungi; G5, Chytridiomycota; G6, Mucoromycota; G7, Olpidiomycota; G8, Glomeromycota; G9, Zoopagomycota; G10, Rozellomycota; G11, Basidiobolomycota; G12, Blastocladiomycota; G13, Kickxellomycota; G14, Calcarisporiellomycota; G15, Monoblepharomycota.

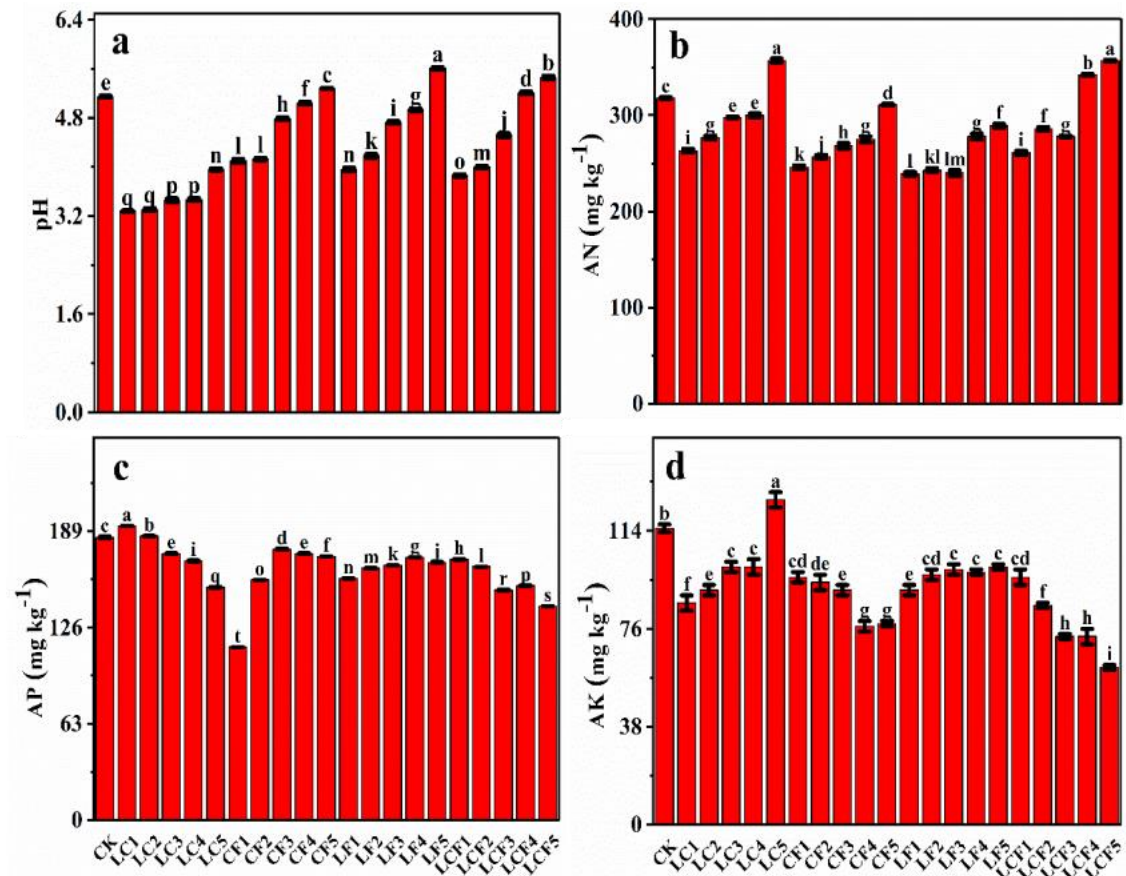

**Fig. S1** Conventional chemical properties of the combined pollution soils based on various combinations of lanthanum (La), cerium (Ce), and fluorine (F), showing variations in the levels of pH (a), hydrolysable nitrogen (b), available phosphorus (c), and available potassium (d). CK, control; LC, La + Ce contaminated soil; CF, Ce + F contaminated soil; LF, La + F contaminated soil; LCF, La + Ce + F contaminated soil. Different lowercase letters above bars indicate significant difference among different groups, and the error bars represent the standard deviations based on three biological replicates of each group.
